# Supplementary material
Source: publisher site journal article supplement (https://www.dovepress.com/article/609445)
Supplement: Supplementary file 1 [file 609445%20Supplementary%20Material.docx]

**Supplementary Table 1.** Summary of key findings from previous studies on the association between CFICB/FICB and postoperative delirium

| Study | Year | Design | Sample Size | opioid | Key Finding | Consistency |
| --- | --- | --- | --- | --- | --- | --- |
| Mitchell et al.23 | 2025 | Retrospective cohort | 209 | None | CFICB improved pain and reduced opioid use, but delirium rate similar to control | Yes |
| Libos Zabala  et al.24 | 2025 | Multicenter retrospective | 218 | Not Reported | No significant association between FICB and delirium (p = 0.442) | Yes |
| Salottolo et al.25 | 2022 | Prospective observational | 517 | None | POD rate: 5.8% (FICB) vs 4.4% (control) (OR = 1.2, p = 0.65) | Yes |
| Mouzopoulos et al.26  (high-risk subgroup) | 2009 | RCT | 207 | None | FICB not superior to placebo (RR = 0.84, 95% CI: 0.47–1.52) | Yes |
| Corbella-Giménez  et al.27 | 2025 | Before-after study | 261 | None | Optimized pathway including FICB reduced POD (44%→29%,p = 0.017) | Partial |
| Finch et al.28 | 2026 | Systematic review | 1205 | Not Reported | Meta-analysis: FICB reduces delirium (OR 0.46, 95% CI 0.30-0.69). RCT: no reduction (16% vs 17%,p = 0.83) | Mixed |

**Abbreviations:** CFICB, continuous fascia iliaca compartment block; FICB, fascia iliaca compartment block; POD, postoperative delirium; RCT, randomized controlled trial; OR, odds ratio; RR, risk ratio; CI, confidence interval. "Yes" indicates the study reported no independent association between CFICB/FICB and reduced POD risk, aligning with the present series; "Partial" indicates the observed benefit was achieved with a multimodal approach rather than FICB alone; "Mixed" reflects inconsistent evidence (meta-analysis positive, RCT negative).
